# Supplementary material for: Inhibitory effect of thiamine salts on steel corrosion in an acidic environment: an experimental and theoretical approach
Source: Royal Society of Chemistry journal article supplement (doi:10.1039/d6ra02411d), 2026-05-14
Supplement: d6ra02411d1.pdf [file d6ra02411d1.pdf]

## The Supporting Information

### Inhibitory Effect of Thiamine Salts on Steel Corrosion in Acidic Environment: An Experimental and Theoretical Approach

Dinh Quy Huong,<sup>\*a</sup> Nguyen Phuc Quynh Ly,<sup>a</sup> Pham Dinh Tu Tai,<sup>b</sup> Dinh Tuan,<sup>c</sup> Nguyen Minh Tam,<sup>d</sup> Le Quoc Thang,<sup>a</sup> Pham Cam Nam<sup>e</sup>

<sup>a</sup>Department of Chemistry, University of Education, Hue University, Hue City, Viet Nam

<sup>b</sup>Department of Planning, Finance and Facilities Management, Hue University, Hue City, Viet Nam

<sup>c</sup>Faculty of Pharmacy, Nam Can Tho University, 168 Nguyen Van Cu Ext, Can Tho, Viet Nam

<sup>d</sup>Faculty of Basic Sciences, University of Phan Thiet, 225 Nguyen Thong, Phan Thiet City, Binh Thuan, Viet Nam

<sup>e</sup> Faculty of Chemical Engineering & Strategic Materials & Advanced Research Team – DUT (SMART-DUT), The University of Danang – University of Science and Technology, Danang, 550000, Viet Nam

\*: Corresponding author: dqhuong@hueuni.edu.vn

#### List of supporting information

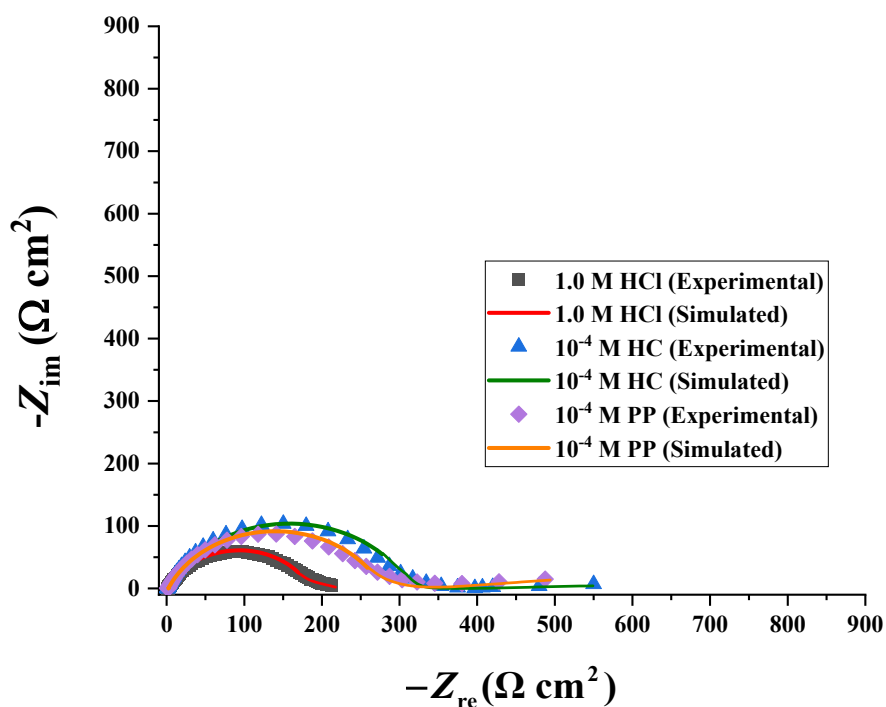

(a)

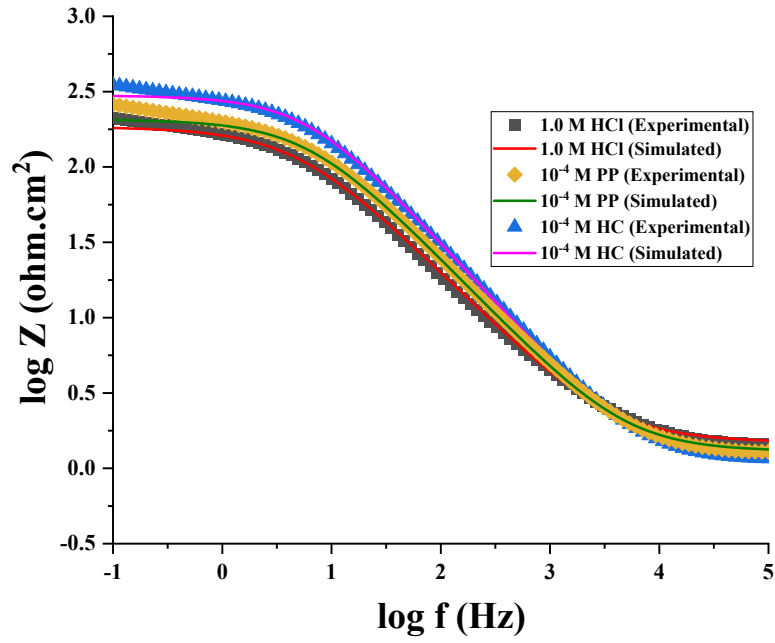

(b)

**Fig. S1** A representative of example simulation of (a) Nyquist and (b) Bode plots recorded for steel in 1.0 M HCl without and with inhibitors .

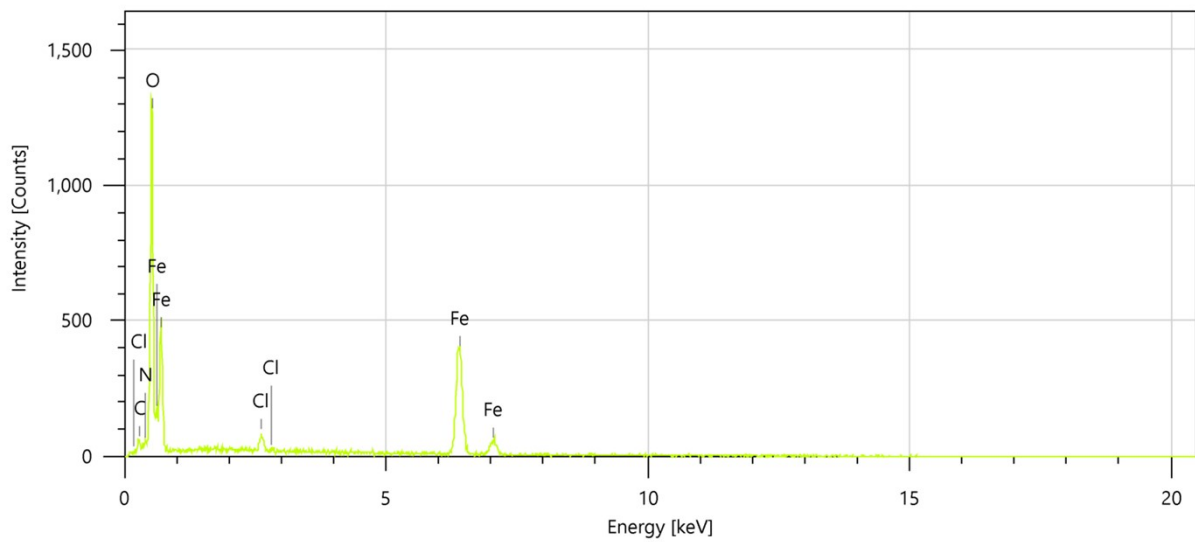

(a) 1.0 M HCl

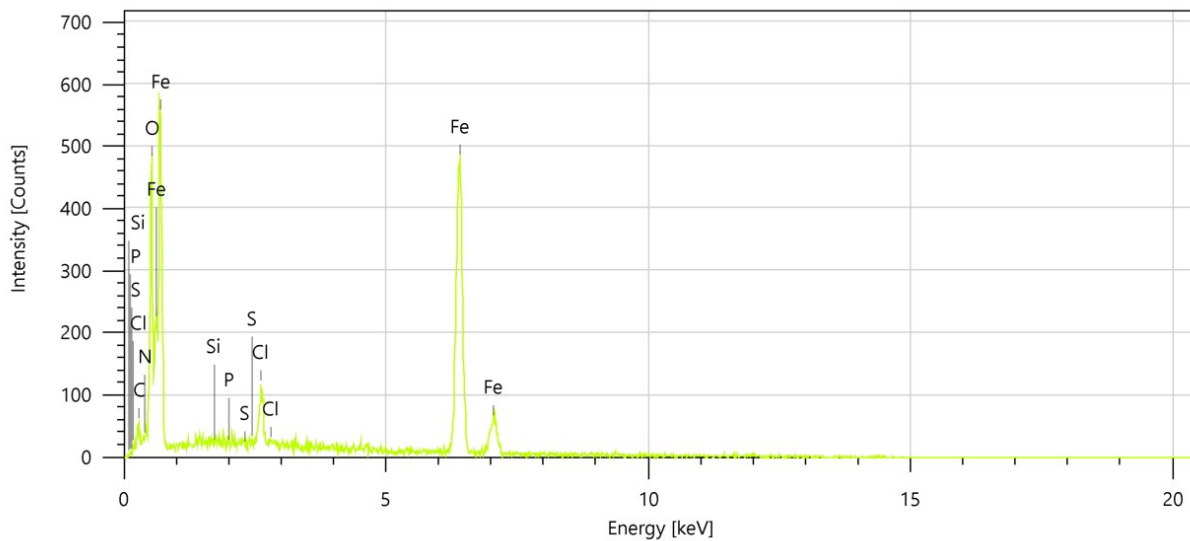

(b)  $5 \times 10^{-3}$  M HC

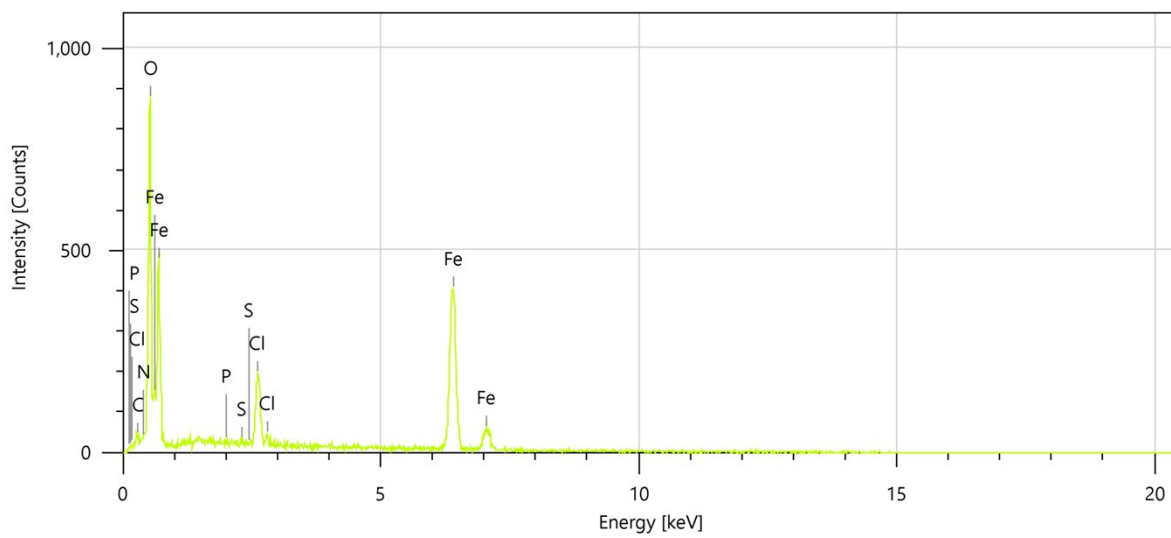

(c)  $5 \times 10^{-3}$  M PP

**Fig. S2** EDX spectra of steel specimens (a) in 1.0 M HCl, in the presence of (b)  $5 \times 10^{-3}$  M HC and (c)  $5 \times 10^{-3}$  M PP.

**Table S1** Details on the calculation of the EIS parameters

An equivalent circuit model was employed to accurately describe the impedance behavior of the system. In this model, a constant phase element (CPE) is used instead of the ideal double-layer capacitance ( $C_{dl}$ ) in the classical Randles circuit to account for surface heterogeneity and non-ideal capacitive behavior at the electrode/electrolyte interface. The impedance of the CPE is defined as follows:

$$Z_{CPE} = Y_o^{-1} \cdot (j\omega)^{-n} \quad (1')$$

Where  $\omega$  is the angular frequency ( $\omega = 2\pi f$ ,  $f$  is the frequency),  $j$  is the virtual unit,  $Y_o$  is the value of CPE and  $n$  is the compression ratio.  $n$  equals 1 when the electrode surface is homogeneous and flat. The value of  $C_{dl}$  can be estimated according to the equation:

$$C_{dl} = Y_o \cdot (\omega_{max})^{n-1} \quad (2')$$

where  $\omega_{max}$  is the angular frequency at which the imaginary component of the impedance reaches its maximum value, defined as:

$$\omega_{max} = 2\pi f_{max} \quad (3')$$

This approach provides a more realistic estimation of the interfacial capacitance and enables a more accurate interpretation of the electrochemical processes occurring at the electrode surface.

**Table S2** Details on molecular dynamics simulations

Molecular dynamics (MD) simulations were carried out using Materials Studio 8.0 developed by BIOVIA Inc.. The interaction between the inhibitor molecule and the steel surface was investigated within a simulation box of dimensions  $30.40 \times 38.20 \times 60.25$  Å. Under ambient conditions, iron crystallizes in a body-centered cubic (bcc) structure, exposing several low-index surfaces such as (110), (100), (111), (211), (311), (321), and (210). Among these, the Fe(110) facet is the most thermodynamically stable and exhibits the highest surface atomic density, thereby contributing dominantly to the overall crystal morphology. Consequently, the Fe(110)

surface was selected as the representative adsorption substrate for modeling the inhibitor–metal interaction in an aggressive medium.

The simulation cell was constructed with periodic boundary conditions, comprising a lower Fe(110) slab and an upper aqueous phase. In the simulated corrosive environment, the composition of the aqueous phase was established based on a molar ratio of H<sub>2</sub>O to HCl of 500:9, in order to realistically reproduce acidic conditions at the molecular level. Accordingly, the baseline simulation system was constructed to include one inhibitor molecule, 491 water molecules, 9 hydronium ions (H<sub>3</sub>O<sup>+</sup>), and 9 chloride ions (Cl<sup>-</sup>), ensuring both chemical representativeness and overall charge neutrality.

For systems involving protonated inhibitor species, slight adjustments in the composition were required to maintain electrostatic balance. In the case of protonated HC, the system consisted of one protonated HC cation, 491 water molecules, 9 hydronium ions, and 11 chloride ions. The increased number of chloride ions compensates for the additional positive charge introduced by protonation of the inhibitor molecule. Similarly, for the protonated PP system, the composition was defined as one protonated PP cation, 492 water molecules, 8 hydronium ions, and 10 chloride ions. This modification reflects a redistribution of ionic species to preserve electroneutrality while maintaining a composition close to the target H<sub>2</sub>O/HCl molar ratio.

The system was equilibrated at 298 K under the canonical NVT ensemble for a total simulation time of 1000 ps, with an integration time step of 1.0 fs, employing the COMPASS II force field to accurately describe interatomic interactions. Long-range electrostatic interactions as well as van der Waals forces were treated using the Ewald summation method to ensure computational accuracy.

Prior to MD simulations, the geometrical optimization of the protonated inhibitor molecules was performed using the DMol3 package at the density functional theory (DFT) level, with the B3LYP exchange–correlation functional and a DNP basis set, along with a global orbital cutoff of 3.5 Å.

The interaction between the inhibitor molecule and the Fe(110) surface was quantified in terms of the interaction energy ( $E_{\text{interaction}}$ ), calculated using the following expression:

$$E_{\text{interaction}} = E_{\text{total}} - (E_{\text{surface+solution}} + E_{\text{inhibitor}}) \quad (4')$$

where  $E_{\text{total}}$  represents the total energy of the entire simulation system,  $E_{\text{surface+solution}}$  corresponds to the energy of the Fe(110) slab together with water molecules, hydronium ions, and chloride ions, and  $E_{\text{inhibitor}}$  is the energy of the isolated inhibitor molecule. Furthermore, the binding energy ( $E_{\text{binding}}$ ) is directly related to the interaction energy and can be expressed as follows:

$$E_{\text{binding}} = -E_{\text{interaction}} \quad (5')$$

A higher (more positive) binding energy indicates stronger adsorption of the inhibitor on the metal surface, reflecting enhanced corrosion inhibition performance.

**Table S3** Optimized structure of HC and PP in water using B3LYP/6-311++G(d,p)

|     | HC          |             | $[\text{C}_{12}\text{H}_{17}\text{N}_4\text{OS}]^+$ |
|-----|-------------|-------------|-----------------------------------------------------|
| 1 1 |             |             |                                                     |
| S   | -1.78517100 | -1.58969500 | -0.91898200                                         |
| O   | -6.10046700 | -0.52860300 | 0.93053200                                          |
| N   | -0.43797400 | 0.47728700  | -0.45392000                                         |
| N   | 3.70154000  | -0.43945400 | 1.14013500                                          |
| N   | 4.19247500  | 0.19313500  | -1.10437400                                         |

|   |             |             |             |
|---|-------------|-------------|-------------|
| N | 1.68997500  | -0.00140100 | 2.14587100  |
| C | -1.76554800 | 0.90253800  | -0.32823600 |
| C | 0.72714600  | 1.41674100  | -0.30430600 |
| C | -2.64722000 | -0.11595100 | -0.55456000 |
| C | -4.14368100 | -0.10494900 | -0.47736700 |
| C | 2.04891400  | 0.73312300  | -0.15086400 |
| C | -0.30206200 | -0.80114300 | -0.76368500 |
| C | -2.08172400 | 2.32319600  | 0.00926100  |
| C | -4.68070500 | -0.49363300 | 0.91636400  |
| C | 2.47454800  | 0.10921100  | 1.05179800  |
| C | 2.97579000  | 0.73725300  | -1.18325400 |
| C | 4.49715900  | -0.37819600 | 0.07334300  |
| C | 5.86566600  | -0.98711700 | 0.19494800  |
| H | 0.50113000  | 2.05087300  | 0.55331100  |
| H | 0.73055800  | 2.05109300  | -1.19112800 |
| H | -4.56377500 | -0.79427800 | -1.21326300 |
| H | -4.50648600 | 0.89298300  | -0.73637300 |
| H | 0.65442300  | -1.27618500 | -0.90881900 |
| H | -1.73745400 | 2.57941400  | 1.01470800  |
| H | -1.61700100 | 3.01326800  | -0.69854100 |
| H | -3.15731300 | 2.48293100  | -0.02329100 |
| H | -4.28763700 | 0.19396700  | 1.67403600  |
| H | -4.34798400 | -1.50136500 | 1.17317800  |

|           |             |             |                                                                        |
|-----------|-------------|-------------|------------------------------------------------------------------------|
| H         | 2.71797600  | 1.21338800  | -2.12663700                                                            |
| H         | 0.81711600  | 0.48942600  | 2.24210800                                                             |
| H         | 2.10917200  | -0.37160500 | 2.98485000                                                             |
| H         | -6.42331200 | 0.37769100  | 0.87754700                                                             |
| H         | 5.96529400  | -1.53132200 | 1.13235800                                                             |
| H         | 6.05425400  | -1.65870200 | -0.64552000                                                            |
| H         | 6.62569000  | -0.20103700 | 0.15631300                                                             |
| <b>PP</b> |             |             | $[\text{C}_{12}\text{H}_{19}\text{N}_4\text{O}_7\text{P}_2\text{S}]^+$ |
| 1 1       |             |             |                                                                        |
| S         | -1.22640100 | 0.40569900  | 2.03728200                                                             |
| O         | 3.15714600  | -1.36629100 | 0.97180100                                                             |
| N         | -2.35595000 | 0.39545800  | -0.20613100                                                            |
| N         | -6.68461700 | -0.95409400 | 0.02591600                                                             |
| N         | -6.91372600 | 1.40100900  | -0.25533100                                                            |
| N         | -4.73116400 | -2.07533200 | -0.39444100                                                            |
| C         | -0.99510200 | 0.29238900  | -0.51248900                                                            |
| C         | -3.41573700 | 0.46636600  | -1.27179000                                                            |
| C         | -0.22431500 | 0.28572800  | 0.61447700                                                             |
| C         | 1.26692000  | 0.16645100  | 0.72858800                                                             |
| C         | -4.81354700 | 0.33485100  | -0.75502600                                                            |
| C         | -2.61930600 | 0.46604800  | 1.08787900                                                             |
| C         | -0.53401200 | 0.21638300  | -1.93134600                                                            |
| C         | 1.72053000  | -1.29862100 | 0.77130200                                                             |

|   |             |             |             |
|---|-------------|-------------|-------------|
| C | -5.40391300 | -0.90352300 | -0.38802600 |
| C | -5.64459000 | 1.44285200  | -0.66684000 |
| C | -7.37557600 | 0.18354500  | 0.07806500  |
| C | -8.80569600 | 0.10333100  | 0.53199400  |
| H | -3.17356800 | -0.31426900 | -1.99354100 |
| H | -3.28771000 | 1.42733400  | -1.77074200 |
| H | 1.61423600  | 0.66890200  | 1.63348700  |
| H | 1.73432200  | 0.67697400  | -0.11541200 |
| H | -3.61741400 | 0.56311500  | 1.48293900  |
| H | -0.87924600 | -0.70176700 | -2.41361800 |
| H | -0.89745400 | 1.06682900  | -2.51270300 |
| H | 0.55327500  | 0.22314700  | -1.97113600 |
| H | 1.45404600  | -1.83163700 | -0.14203700 |
| H | 1.28842700  | -1.81816100 | 1.62462700  |
| H | -5.25903500 | 2.41983900  | -0.94967800 |
| H | -3.83325200 | -2.18060100 | -0.83562300 |
| H | -5.26162800 | -2.91554400 | -0.22224800 |
| H | -9.02731700 | -0.88159700 | 0.93919300  |
| H | -9.00633900 | 0.87086500  | 1.28225600  |
| H | -9.47318400 | 0.29553300  | -0.31364900 |
| P | 4.19597200  | -1.47848600 | -0.23357800 |
| O | 5.53858700  | -1.90348800 | 0.48054600  |
| H | 6.04627100  | -1.13851000 | 0.84892900  |

|   |            |             |             |
|---|------------|-------------|-------------|
| O | 4.44359300 | 0.08768200  | -0.68655600 |
| O | 3.77147100 | -2.29301800 | -1.38141900 |
| P | 5.44768400 | 1.20533400  | -0.09921800 |
| O | 4.54001500 | 2.40293600  | 0.41635800  |
| H | 4.31057400 | 2.35981900  | 1.35557500  |
| O | 6.03572900 | 1.75621100  | -1.46142600 |
| H | 6.64448100 | 2.50355000  | -1.37586200 |
| O | 6.37625500 | 0.61699200  | 0.90242500  |

**Table S4** Optimized structures of protonated HC and PP in water using B3LYP/6-311G(d,p)

|     | HC-pS1      | $[\text{C}_{12}\text{H}_{18}\text{N}_4\text{OS}]^{2+}$ |             |
|-----|-------------|--------------------------------------------------------|-------------|
| 2 1 |             |                                                        |             |
| S   | -1.77294700 | -1.78391300                                            | -0.57028200 |
| O   | -6.26389900 | -0.18743800                                            | 0.73763100  |
| N   | -0.42649600 | 0.34408500                                             | -0.35787500 |
| N   | 3.87854300  | -0.23440500                                            | 1.09805600  |
| N   | 4.12736700  | 0.10498100                                             | -1.24857900 |
| N   | 1.97389700  | 0.30198500                                             | 2.24592300  |
| C   | -1.79802800 | 0.78650300                                             | -0.41354600 |
| C   | 0.72558900  | 1.34379500                                             | -0.29038400 |
| C   | -2.68512400 | -0.22921700                                            | -0.45599400 |
| C   | -4.17568500 | -0.22130300                                            | -0.51226300 |
| C   | 2.06938100  | 0.71617500                                             | -0.16090500 |

|   |             |             |             |
|---|-------------|-------------|-------------|
| C | -0.23616400 | -0.92588000 | -0.36751700 |
| C | -2.10602400 | 2.24218200  | -0.41643400 |
| C | -4.85832100 | -0.14214600 | 0.88139900  |
| C | 2.63172600  | 0.27707800  | 1.06888100  |
| C | 2.89665400  | 0.60722700  | -1.27615500 |
| C | 4.56217300  | -0.30475400 | -0.04048300 |
| C | 5.94864300  | -0.87666400 | 0.01547200  |
| H | 0.46968800  | 2.00655900  | 0.53672200  |
| H | 0.64795100  | 1.91372200  | -1.21626700 |
| H | -4.54324200 | -1.11110300 | -1.02519200 |
| H | -4.48384400 | 0.64006600  | -1.11052300 |
| H | 0.72098800  | -1.42717400 | -0.32821500 |
| H | -1.79234400 | 2.71046300  | 0.51938100  |
| H | -1.60870400 | 2.74760200  | -1.24655900 |
| H | -3.17825300 | 2.38981900  | -0.52228200 |
| H | -4.52973900 | 0.76004600  | 1.40680300  |
| H | -4.58130200 | -1.00726500 | 1.48418700  |
| H | 2.53306800  | 0.95280400  | -2.24134200 |
| H | 1.11502900  | 0.80747200  | 2.38513500  |
| H | 2.49664600  | 0.05001400  | 3.07116600  |
| H | -6.56646700 | 0.66572400  | 0.40685000  |
| H | 6.17147200  | -1.25668100 | 1.01057300  |
| H | 6.05126500  | -1.67850300 | -0.71950500 |

|     |             |             |                                                                   |
|-----|-------------|-------------|-------------------------------------------------------------------|
| H   | 6.67721000  | -0.10447800 | -0.24773400                                                       |
| H   | -1.84317500 | -2.27149000 | 0.70516800                                                        |
|     | HC-pO2      |             | [C <sub>12</sub> H <sub>18</sub> N <sub>4</sub> OS] <sup>2+</sup> |
| 2 1 |             |             |                                                                   |
| S   | -1.73570800 | -1.64917300 | -0.77531500                                                       |
| O   | -6.09978300 | -0.42613000 | 0.98380600                                                        |
| N   | -0.38557600 | 0.45387400  | -0.50798700                                                       |
| N   | 3.75067100  | -0.29791600 | 1.19084500                                                        |
| N   | 4.22391800  | 0.02196300  | -1.12262200                                                       |
| N   | 1.76327200  | 0.31249900  | 2.15424400                                                        |
| C   | -1.71039200 | 0.89206400  | -0.40831700                                                       |
| C   | 0.78759100  | 1.39847100  | -0.45626900                                                       |
| C   | -2.58904700 | -0.14613000 | -0.53182500                                                       |
| C   | -4.09200000 | -0.11267700 | -0.48344100                                                       |
| C   | 2.10202100  | 0.72265600  | -0.22621300                                                       |
| C   | -0.25576900 | -0.84770500 | -0.70146900                                                       |
| C   | -2.01753000 | 2.33924500  | -0.20595300                                                       |
| C   | -4.58867700 | -0.43615900 | 0.92167900                                                        |
| C   | 2.53438600  | 0.25810900  | 1.04544300                                                        |
| C   | 3.01535700  | 0.57485800  | -1.25954500                                                       |
| C   | 4.53169600  | -0.39916400 | 0.11514000                                                        |
| C   | 5.86880800  | -1.05857300 | 0.30104100                                                        |
| H   | 0.56078500  | 2.12329900  | 0.32526400                                                        |

|        |             |                                                        |             |
|--------|-------------|--------------------------------------------------------|-------------|
| H      | 0.79679300  | 1.93103500                                             | -1.40765100 |
| H      | -4.50016300 | -0.83225900                                            | -1.19613300 |
| H      | -4.43897200 | 0.87601300                                             | -0.78760500 |
| H      | 0.69901500  | -1.33697300                                            | -0.80747900 |
| H      | -1.64043000 | 2.69170900                                             | 0.75753400  |
| H      | -1.57181400 | 2.94960500                                             | -0.99441700 |
| H      | -3.09246100 | 2.50476800                                             | -0.22056000 |
| H      | -4.30684200 | 0.29731600                                             | 1.67053300  |
| H      | -4.33896300 | -1.43757100                                            | 1.25994800  |
| H      | 2.75532600  | 0.92971900                                             | -2.25422500 |
| H      | 0.92264400  | 0.86358200                                             | 2.20094600  |
| H      | 2.19735300  | 0.06362900                                             | 3.02999200  |
| H      | -6.51491200 | 0.44550200                                             | 0.84174300  |
| H      | 6.21946900  | -0.93778200                                            | 1.32556600  |
| H      | 5.77861900  | -2.13148000                                            | 0.09973100  |
| H      | 6.59641900  | -0.64919700                                            | -0.39957000 |
| H      | -6.53694100 | -1.09803100                                            | 0.42799400  |
| HC-pN3 |             | $[\text{C}_{12}\text{H}_{18}\text{N}_4\text{OS}]^{2+}$ |             |
| 2 1    |             |                                                        |             |
| S      | -5.23761300 | -1.05780200                                            | -1.55639700 |
| O      | -8.20486700 | -1.15860900                                            | 2.20614000  |
| N      | -3.93014000 | 1.03600100                                             | -1.22094600 |
| N      | 7.37798000  | -1.08787400                                            | -0.11317600 |

|   |             |             |             |
|---|-------------|-------------|-------------|
| N | 7.78022900  | 1.29116300  | 0.02416700  |
| N | 5.37122900  | -2.00367500 | 0.40224900  |
| C | -5.03649800 | 1.22686700  | -0.40644600 |
| C | 4.42081300  | 0.69378800  | 1.24224100  |
| C | -5.88134200 | 0.15477200  | -0.46909000 |
| C | -7.15989800 | -0.08082900 | 0.27350500  |
| C | 5.62756900  | 0.41257000  | 0.70834800  |
| C | -3.88648400 | -0.10290300 | -1.88875300 |
| C | -5.16271600 | 2.49051400  | 0.37967900  |
| C | -6.96274200 | -0.88749900 | 1.57374200  |
| C | 6.10925700  | -0.92244300 | 0.33410900  |
| C | 6.58706300  | 1.48015300  | 0.47660200  |
| C | 8.14114500  | -0.02852500 | -0.24404300 |
| C | 9.53322900  | -0.20466800 | -0.73005000 |
| H | 3.67310900  | -0.05705500 | 1.46641400  |
| H | 4.15933300  | 1.71856700  | 1.48106400  |
| H | -7.87314100 | -0.61392600 | -0.35890500 |
| H | -7.60868900 | 0.88614400  | 0.51440800  |
| H | -3.08589700 | -0.36911100 | -2.56051000 |
| H | -4.37734800 | 2.55362800  | 1.13698600  |
| H | -5.07563200 | 3.36048900  | -0.27560800 |
| H | -6.12654100 | 2.53443300  | 0.88259200  |
| H | -6.27701700 | -0.35528900 | 2.24286600  |

|        |             |             |                                                        |
|--------|-------------|-------------|--------------------------------------------------------|
| H      | -6.51852400 | -1.85793400 | 1.34316400                                             |
| H      | 6.27864500  | 2.49750500  | 0.70617300                                             |
| H      | 4.40651700  | -2.00559200 | 0.69859200                                             |
| H      | 5.78635500  | -2.88643900 | 0.13008600                                             |
| H      | -8.54410400 | -0.33222900 | 2.56758400                                             |
| H      | 9.76152500  | -1.25184600 | -0.90992800                                            |
| H      | 9.66601300  | 0.37694500  | -1.64804500                                            |
| H      | 10.22595700 | 0.21821500  | 0.00406000                                             |
| H      | -3.20128100 | 1.73713500  | -1.31288100                                            |
| HC-pN4 |             |             | $[\text{C}_{12}\text{H}_{18}\text{N}_4\text{OS}]^{2+}$ |
| 2 1    |             |             |                                                        |
| S      | -1.85092300 | -1.86129300 | -0.13960800                                            |
| O      | -6.14302600 | -0.02984900 | 1.07945400                                             |
| N      | -0.48390600 | 0.19274600  | -0.60105900                                            |
| N      | 3.73842100  | 0.18370500  | 1.10422100                                             |
| N      | 4.13094500  | -0.40335600 | -1.11780900                                            |
| N      | 1.78480900  | 1.12954300  | 1.90375400                                             |
| C      | -1.80787400 | 0.64456800  | -0.67067500                                            |
| C      | 0.67123500  | 1.10171500  | -0.88062300                                            |
| C      | -2.69759200 | -0.36535800 | -0.43839100                                            |
| C      | -4.19335400 | -0.30606100 | -0.37224400                                            |
| C      | 2.00761300  | 0.56335500  | -0.45900600                                            |
| C      | -0.36080500 | -1.10028700 | -0.33853900                                            |

|   |             |             |             |
|---|-------------|-------------|-------------|
| C | -2.11334700 | 2.07350300  | -0.98177600 |
| C | -4.72446200 | 0.01188300  | 1.04186500  |
| C | 2.47541500  | 0.64545500  | 0.88345600  |
| C | 2.88687900  | 0.05063100  | -1.38772500 |
| C | 4.53817100  | -0.33425900 | 0.12337800  |
| C | 5.88938000  | -0.81726300 | 0.52753200  |
| H | 0.45684600  | 2.04976200  | -0.38828100 |
| H | 0.67710600  | 1.28814500  | -1.95428500 |
| H | -4.62168300 | -1.25771900 | -0.69399200 |
| H | -4.55099300 | 0.45416500  | -1.07149100 |
| H | 0.58625700  | -1.60930500 | -0.26775400 |
| H | -1.78293300 | 2.73823600  | -0.17921700 |
| H | -1.63445200 | 2.39064800  | -1.91095800 |
| H | -3.18704600 | 2.20410700  | -1.09838100 |
| H | -4.34079700 | 0.98217500  | 1.37782800  |
| H | -4.37787600 | -0.74726500 | 1.74556500  |
| H | 2.58548800  | -0.00399400 | -2.42865000 |
| H | 0.84869100  | 1.48404600  | 1.78826300  |
| H | 2.16833100  | 1.17948300  | 2.83722600  |
| H | -6.47968000 | 0.73181500  | 0.59476100  |
| H | 5.80101000  | -1.64378400 | 1.23843400  |
| H | 6.42171800  | -1.15716900 | -0.35667300 |
| H | 6.45615800  | -0.01760300 | 1.01121300  |

|     |             |             |                                                                   |
|-----|-------------|-------------|-------------------------------------------------------------------|
| H   | 4.11337200  | 0.22797400  | 2.04722700                                                        |
|     | HC-pN5      |             | [C <sub>12</sub> H <sub>18</sub> N <sub>4</sub> OS] <sup>2+</sup> |
| 2 1 |             |             |                                                                   |
| S   | -1.86922100 | -1.85138000 | -0.27392200                                                       |
| O   | -6.09243100 | -0.06144300 | 1.17507600                                                        |
| N   | -0.47420300 | 0.19827300  | -0.66957200                                                       |
| N   | 3.65829400  | 0.16121500  | 1.26892600                                                        |
| N   | 4.15326300  | -0.32931800 | -0.94798800                                                       |
| N   | 1.64278000  | 1.02391100  | 1.87128000                                                        |
| C   | -1.79056500 | 0.67979600  | -0.66497800                                                       |
| C   | 0.69488900  | 1.08320700  | -0.96851000                                                       |
| C   | -2.69332600 | -0.32452600 | -0.45980700                                                       |
| C   | -4.18526400 | -0.24383200 | -0.34576300                                                       |
| C   | 2.01263700  | 0.55140700  | -0.48224400                                                       |
| C   | -0.37142700 | -1.11035500 | -0.48350700                                                       |
| C   | -2.07680800 | 2.13105900  | -0.87646200                                                       |
| C   | -4.67453900 | -0.04470200 | 1.10449800                                                        |
| C   | 2.42391000  | 0.58576400  | 0.89426800                                                        |
| C   | 2.93628200  | 0.08411900  | -1.37227600                                                       |
| C   | 4.49571800  | -0.28235700 | 0.37044500                                                        |
| C   | 5.86055500  | -0.74306700 | 0.75596400                                                        |
| H   | 0.48415400  | 2.05265900  | -0.51926200                                                       |
| H   | 0.72329500  | 1.22425000  | -2.04894100                                                       |

|        |             |                                                        |             |
|--------|-------------|--------------------------------------------------------|-------------|
| H      | -4.64108800 | -1.15485100                                            | -0.73965000 |
| H      | -4.54457500 | 0.58189900                                             | -0.96497700 |
| H      | 0.56647400  | -1.64134900                                            | -0.47860100 |
| H      | -1.68420000 | 2.73934900                                             | -0.05728500 |
| H      | -1.64522300 | 2.49245000                                             | -1.81265200 |
| H      | -3.15178600 | 2.29196000                                             | -0.92021000 |
| H      | -4.26157100 | 0.88336300                                             | 1.51597600  |
| H      | -4.32788700 | -0.87124500                                            | 1.72781400  |
| H      | 2.75122500  | 0.02447400                                             | -2.43588900 |
| H      | 0.70843500  | 1.37003700                                             | 1.72574000  |
| H      | 2.00661600  | 1.03210400                                             | 2.81392700  |
| H      | -6.42364900 | 0.74930500                                             | 0.77327200  |
| H      | 5.95817700  | -0.71179800                                            | 1.83781300  |
| H      | 6.03626900  | -1.76090900                                            | 0.40008100  |
| H      | 6.61624000  | -0.09430100                                            | 0.30477800  |
| H      | 4.82275600  | -0.67140600                                            | -1.62808400 |
| HC-pN6 |             | $[\text{C}_{12}\text{H}_{18}\text{N}_4\text{OS}]^{2+}$ |             |
| 2 1    |             |                                                        |             |
| S      | -1.84830100 | -1.80545000                                            | 0.41772400  |
| O      | -6.23780500 | 0.16190700                                             | 0.87012500  |
| N      | -0.48995300 | 0.09554100                                             | -0.50090900 |
| N      | 3.92282300  | 0.46102500                                             | 0.93682900  |
| N      | 3.95024200  | -0.86300100                                            | -1.02237700 |

|   |             |             |             |
|---|-------------|-------------|-------------|
| N | 2.18826100  | 1.85052900  | 1.60680300  |
| C | -1.81551300 | 0.47375400  | -0.75062000 |
| C | 0.65146500  | 0.95777200  | -0.93375600 |
| C | -2.70044300 | -0.46729800 | -0.30756800 |
| C | -4.19820600 | -0.43854000 | -0.34083000 |
| C | 2.00752400  | 0.46731700  | -0.50363600 |
| C | -0.36152500 | -1.07577800 | 0.10464800  |
| C | -2.12458300 | 1.76579300  | -1.43318600 |
| C | -4.81974300 | 0.21688000  | 0.91125900  |
| C | 2.71853200  | 0.87019200  | 0.62435900  |
| C | 2.73073600  | -0.42046300 | -1.31278500 |
| C | 4.51512700  | -0.41579800 | 0.10493000  |
| C | 5.88059400  | -0.89731400 | 0.47297700  |
| H | 0.44334700  | 1.96014100  | -0.56467600 |
| H | 0.61793400  | 1.00193400  | -2.02236200 |
| H | -4.59203000 | -1.45312200 | -0.42983500 |
| H | -4.52273300 | 0.10474900  | -1.23186600 |
| H | 0.58585100  | -1.51731600 | 0.36523200  |
| H | -1.80023500 | 2.62072200  | -0.83414900 |
| H | -1.64109800 | 1.82697800  | -2.41121600 |
| H | -3.19787500 | 1.85660400  | -1.58523400 |
| H | -4.45953600 | 1.24685300  | 1.01392400  |
| H | -4.51812300 | -0.33382800 | 1.80434100  |

|        |             |                                                                           |             |
|--------|-------------|---------------------------------------------------------------------------|-------------|
| H      | 2.29056400  | -0.77743600                                                               | -2.23936000 |
| H      | 1.88725700  | 2.73213300                                                                | 1.17825400  |
| H      | 2.95243400  | 2.06577500                                                                | 2.25826500  |
| H      | -6.54365000 | 0.78080100                                                                | 0.19791400  |
| H      | 5.83909600  | -1.43625200                                                               | 1.42341400  |
| H      | 6.27206200  | -1.55398700                                                               | -0.30050200 |
| H      | 6.55174500  | -0.04656700                                                               | 0.61265500  |
| H      | 1.40685000  | 1.48600000                                                                | 2.16343500  |
| PP-pS1 |             | $[\text{C}_{12}\text{H}_{20}\text{N}_4\text{O}_7\text{P}_2\text{S}]^{2+}$ |             |
| 2 1    |             |                                                                           |             |
| S      | -1.47122600 | 2.16611400                                                                | 0.61316900  |
| O      | 3.14118500  | 0.19629100                                                                | 1.07227100  |
| N      | -2.59793500 | 0.14002900                                                                | -0.39741800 |
| N      | -6.95838600 | -0.62983500                                                               | 0.84190100  |
| N      | -7.13467300 | 0.53768400                                                                | -1.22942800 |
| N      | -5.03412100 | -1.64625600                                                               | 1.54436400  |
| C      | -1.18562300 | -0.11486800                                                               | -0.54974700 |
| C      | -3.64460700 | -0.81017300                                                               | -0.97986800 |
| C      | -0.41304200 | 0.84146500                                                                | 0.00292800  |
| C      | 1.07507100  | 0.96351500                                                                | 0.03923400  |
| C      | -5.04481100 | -0.47664900                                                               | -0.60005400 |
| C      | -2.91657900 | 1.21566100                                                                | 0.22575600  |
| C      | -0.72421400 | -1.33858500                                                               | -1.25841000 |

|   |             |             |             |
|---|-------------|-------------|-------------|
| C | 1.70738400  | 0.24645700  | 1.24912900  |
| C | -5.66785800 | -0.93042700 | 0.59548300  |
| C | -5.86101700 | 0.24009200  | -1.47166600 |
| C | -7.62539500 | 0.08706300  | -0.05778400 |
| C | -9.05244000 | 0.43300400  | 0.25291300  |
| H | -3.33269300 | -1.80350900 | -0.66005500 |
| H | -3.49576600 | -0.74085000 | -2.05786300 |
| H | 1.37698000  | 2.01121300  | 0.03362600  |
| H | 1.45770800  | 0.51086300  | -0.87716200 |
| H | -3.92189000 | 1.55618800  | 0.43361800  |
| H | -1.08765500 | -2.23747500 | -0.75455100 |
| H | -1.08170700 | -1.34690600 | -2.29099700 |
| H | 0.36413900  | -1.37826300 | -1.26501800 |
| H | 1.30644000  | -0.76039100 | 1.36228800  |
| H | 1.54888300  | 0.80110200  | 2.17182800  |
| H | -5.45276600 | 0.58467100  | -2.41920300 |
| H | -4.12324900 | -2.05148000 | 1.40992300  |
| H | -5.58811200 | -1.99579200 | 2.31129300  |
| H | -9.40322500 | -0.11811100 | 1.12348600  |
| H | -9.13395700 | 1.50554100  | 0.45488300  |
| H | -9.68813100 | 0.21786300  | -0.60820000 |
| P | 3.82378900  | -0.94522200 | 0.17486000  |
| O | 4.66745700  | -1.86604100 | 1.14618800  |

|        |             |             |                                                                           |
|--------|-------------|-------------|---------------------------------------------------------------------------|
| H      | 5.54454600  | -1.48099100 | 1.39007400                                                                |
| O      | 4.93729600  | -0.06479100 | -0.63068000                                                               |
| O      | 2.89287400  | -1.65786500 | -0.71569400                                                               |
| P      | 6.45219100  | 0.34981500  | -0.24016300                                                               |
| O      | 6.48391400  | 1.93631200  | -0.22599400                                                               |
| H      | 6.30094300  | 2.33715300  | 0.63569900                                                                |
| O      | 7.16821100  | -0.01715900 | -1.60146300                                                               |
| H      | 8.11598100  | 0.17527700  | -1.63562700                                                               |
| O      | 6.88110100  | -0.32627500 | 1.01129400                                                                |
| H      | -1.48828000 | 1.93271300  | 1.96001500                                                                |
| PP-pN3 |             |             | $[\text{C}_{12}\text{H}_{20}\text{N}_4\text{O}_7\text{P}_2\text{S}]^{2+}$ |
| 2 1    |             |             |                                                                           |
| S      | -0.55924300 | 2.79247400  | 1.04765100                                                                |
| O      | 4.07068900  | 1.57813600  | 0.91288800                                                                |
| N      | -1.59714800 | 1.33501100  | -0.68526700                                                               |
| N      | -8.19113200 | -0.69301400 | 0.80616600                                                                |
| N      | -7.58527600 | -0.42840400 | -1.51824500                                                               |
| N      | -6.75146600 | -1.52189900 | 2.34624100                                                                |
| C      | -0.24852900 | 1.27854500  | -0.99017700                                                               |
| C      | -4.66914300 | -1.70656000 | 0.20538700                                                                |
| C      | 0.48041900  | 2.02872400  | -0.13327400                                                               |
| C      | 1.96666200  | 2.23382100  | -0.10080800                                                               |
| C      | -5.94124200 | -1.27773400 | 0.03986100                                                                |

|   |              |             |             |
|---|--------------|-------------|-------------|
| C | -1.92405500  | 2.08479400  | 0.35243900  |
| C | 0.20429800   | 0.46716200  | -2.15084300 |
| C | 2.66044100   | 1.26158200  | 0.85625300  |
| C | -6.95769700  | -1.17158000 | 1.09764700  |
| C | -6.40259200  | -0.86982700 | -1.27703700 |
| C | -8.45635300  | -0.34965800 | -0.43235900 |
| C | -9.80737600  | 0.17378100  | -0.75787400 |
| H | -4.25906200  | -2.01413100 | 1.15900800  |
| H | -3.99893200  | -1.76177100 | -0.64075600 |
| H | 2.20000200   | 3.25566500  | 0.20599700  |
| H | 2.36199300   | 2.10136900  | -1.10942400 |
| H | -2.93911500  | 2.21711000  | 0.69728200  |
| H | -0.11479200  | -0.57197000 | -2.03962000 |
| H | -0.22391400  | 0.86130600  | -3.07529600 |
| H | 1.28986100   | 0.48325500  | -2.23788200 |
| H | 2.51587900   | 0.22688200  | 0.55486300  |
| H | 2.30199600   | 1.38096300  | 1.87777100  |
| H | -5.69940700  | -0.93888100 | -2.10514700 |
| H | -5.87972700  | -1.89898700 | 2.68663900  |
| H | -7.50905700  | -1.40743500 | 3.00945500  |
| H | -10.44766500 | 0.19351200  | 0.11978400  |
| H | -9.70910300  | 1.17937800  | -1.18061500 |
| H | -10.25201100 | -0.44679800 | -1.54276500 |

|        |             |             |                                                                           |
|--------|-------------|-------------|---------------------------------------------------------------------------|
| P      | 5.20259400  | 0.81215600  | 0.11971800                                                                |
| O      | 4.67849300  | 0.68901500  | -1.38460100                                                               |
| H      | 4.84286800  | -0.19788400 | -1.78543700                                                               |
| O      | 5.07414600  | -0.72714900 | 0.70107900                                                                |
| O      | 6.52910700  | 1.40634300  | 0.33815800                                                                |
| P      | 5.30073700  | -2.13077900 | -0.05865500                                                               |
| O      | 4.29302600  | -3.13243000 | 0.64104500                                                                |
| H      | 3.40466200  | -3.15503200 | 0.25101300                                                                |
| O      | 6.71230400  | -2.55425900 | 0.52600400                                                                |
| H      | 7.09521600  | -3.35522500 | 0.14436900                                                                |
| O      | 5.16311600  | -1.96606800 | -1.52698700                                                               |
| H      | -2.30266900 | 0.83956100  | -1.22584300                                                               |
| PP-pN4 |             |             | $[\text{C}_{12}\text{H}_{20}\text{N}_4\text{O}_7\text{P}_2\text{S}]^{2+}$ |
| 2 1    |             |             |                                                                           |
| S      | -1.15183500 | 1.08722700  | 1.81411300                                                                |
| O      | 3.11137800  | -1.12434900 | 1.14120500                                                                |
| N      | -2.35155800 | 0.54574400  | -0.32424500                                                               |
| N      | -6.58293800 | -1.00130700 | 0.17685600                                                                |
| N      | -6.98992100 | 1.22912900  | -0.36660900                                                               |
| N      | -4.57556300 | -2.10392400 | -0.14093000                                                               |
| C      | -1.00307500 | 0.31852200  | -0.62682000                                                               |
| C      | -3.43492800 | 0.39741200  | -1.34686600                                                               |
| C      | -0.20035000 | 0.56477300  | 0.45016300                                                                |

|   |             |             |             |
|---|-------------|-------------|-------------|
| C | 1.28744400  | 0.40397700  | 0.56395100  |
| C | -4.81165100 | 0.24374600  | -0.76799100 |
| C | -2.57012300 | 0.96081700  | 0.91560000  |
| C | -0.58412400 | -0.12556400 | -1.99025900 |
| C | 1.67657800  | -1.03177700 | 0.94412000  |
| C | -5.28691600 | -0.99206000 | -0.24365200 |
| C | -5.71287000 | 1.28528300  | -0.80587100 |
| C | -7.40703200 | 0.08848100  | 0.11925000  |
| C | -8.79679400 | -0.07900400 | 0.63150500  |
| H | -3.17192900 | -0.45857600 | -1.96757600 |
| H | -3.40313400 | 1.28256200  | -1.98149400 |
| H | 1.68196200  | 1.08648700  | 1.31914900  |
| H | 1.75074700  | 0.68037800  | -0.38512300 |
| H | -3.54818100 | 1.19488700  | 1.30302700  |
| H | -0.99733500 | -1.10691600 | -2.23618700 |
| H | -0.90294900 | 0.58503400  | -2.75638600 |
| H | 0.49994800  | -0.20322900 | -2.03773500 |
| H | 1.36845300  | -1.74935900 | 0.18315400  |
| H | 1.24010100  | -1.31688900 | 1.89973300  |
| H | -5.40257100 | 2.23970000  | -1.21843600 |
| H | -3.61135400 | -2.14736600 | -0.43055400 |
| H | -4.96757400 | -2.95684400 | 0.23369600  |
| H | -8.78309700 | -0.36924800 | 1.68548200  |

|        |             |             |                                                                           |
|--------|-------------|-------------|---------------------------------------------------------------------------|
| H      | -9.32996700 | 0.86129900  | 0.52091500                                                                |
| H      | -9.31839600 | -0.86188100 | 0.07444400                                                                |
| P      | 4.12422000  | -1.52116400 | -0.02695700                                                               |
| O      | 5.42152400  | -1.98236300 | 0.74719800                                                                |
| H      | 5.98913000  | -1.22854000 | 1.04150400                                                                |
| O      | 4.53630700  | -0.07132600 | -0.69354000                                                               |
| O      | 3.60599000  | -2.44083800 | -1.04978500                                                               |
| P      | 5.60529800  | 1.03361700  | -0.20138600                                                               |
| O      | 4.77704700  | 2.34943100  | 0.12655800                                                                |
| H      | 4.52083900  | 2.44427400  | 1.05484400                                                                |
| O      | 6.27933200  | 1.36708000  | -1.59409100                                                               |
| H      | 6.94190600  | 2.07207400  | -1.57165600                                                               |
| O      | 6.45056200  | 0.50733900  | 0.90287000                                                                |
| H      | -6.96421400 | -1.86520000 | 0.55094200                                                                |
| PP-pN5 |             |             | $[\text{C}_{12}\text{H}_{20}\text{N}_4\text{O}_7\text{P}_2\text{S}]^{2+}$ |
| 2 1    |             |             |                                                                           |
| S      | 1.17052600  | -0.47107700 | 2.04964400                                                                |
| O      | -3.14484100 | 1.27799000  | 0.98761200                                                                |
| N      | 2.36461200  | -0.56709300 | -0.15749100                                                               |
| N      | 6.61976100  | 1.11754800  | -0.12073800                                                               |
| N      | 6.97594900  | -1.17876200 | -0.07210200                                                               |
| N      | 4.60307400  | 1.99376600  | -0.70002300                                                               |
| C      | 1.01232500  | -0.46836100 | -0.50963300                                                               |

|   |             |             |             |
|---|-------------|-------------|-------------|
| C | 3.44003600  | -0.72237800 | -1.18633500 |
| C | 0.21128600  | -0.40432300 | 0.59406500  |
| C | -1.28058200 | -0.26478600 | 0.66540500  |
| C | 4.82337700  | -0.42592400 | -0.68368300 |
| C | 2.58847700  | -0.58576300 | 1.14850500  |
| C | 0.59237700  | -0.45717400 | -1.94313400 |
| C | -1.71420900 | 1.20422700  | 0.75565400  |
| C | 5.33453500  | 0.90531000  | -0.50589500 |
| C | 5.70576000  | -1.44306900 | -0.45711300 |
| C | 7.41368900  | 0.10212000  | 0.08853400  |
| C | 8.83213600  | 0.30805500  | 0.49993700  |
| H | 3.18381700  | -0.06392000 | -2.01565100 |
| H | 3.38664500  | -1.74669300 | -1.55367500 |
| H | -1.66342600 | -0.79599800 | 1.53926700  |
| H | -1.72738300 | -0.73363600 | -0.21269900 |
| H | 3.56937400  | -0.67572900 | 1.58561000  |
| H | 0.95810200  | 0.43393300  | -2.45972800 |
| H | 0.95953300  | -1.33917200 | -2.47272700 |
| H | -0.49328000 | -0.45443100 | -2.01157100 |
| H | -1.45879200 | 1.75969500  | -0.14724100 |
| H | -1.25920000 | 1.69435300  | 1.61467600  |
| H | 5.44560700  | -2.48614900 | -0.57494000 |
| H | 3.63944600  | 1.97568400  | -0.99313700 |

|        |             |             |                                                                           |
|--------|-------------|-------------|---------------------------------------------------------------------------|
| H      | 5.03872400  | 2.89638700  | -0.57082600                                                               |
| H      | 9.00833800  | 1.36695900  | 0.66799800                                                                |
| H      | 9.05173900  | -0.25218500 | 1.41168700                                                                |
| H      | 9.50396100  | -0.05126000 | -0.28452500                                                               |
| P      | -4.21169700 | 1.51646600  | -0.17294100                                                               |
| O      | -5.51048000 | 1.95593400  | 0.61119800                                                                |
| H      | -6.03017700 | 1.19521500  | 0.96997800                                                                |
| O      | -4.55362300 | -0.00401700 | -0.71455500                                                               |
| O      | -3.78521400 | 2.38242700  | -1.28125200                                                               |
| P      | -5.57811400 | -1.10762700 | -0.13652900                                                               |
| O      | -4.69715600 | -2.31881300 | 0.38911100                                                                |
| H      | -4.16925200 | -2.78707900 | -0.27348200                                                               |
| O      | -6.26850600 | -1.54183800 | -1.49980000                                                               |
| H      | -6.99732200 | -2.17211400 | -1.40625200                                                               |
| O      | -6.43275700 | -0.55857800 | 0.94502200                                                                |
| H      | 7.61391500  | -1.94985600 | 0.09093200                                                                |
| PP-pN6 |             |             | $[\text{C}_{12}\text{H}_{20}\text{N}_4\text{O}_7\text{P}_2\text{S}]^{2+}$ |
| 2 1    |             |             |                                                                           |
| S      | -1.37281300 | 1.97961100  | -0.13693500                                                               |
| O      | 3.20545300  | 0.41374800  | 0.11951200                                                                |
| N      | -2.66734200 | -0.16535200 | -0.31143300                                                               |
| N      | -7.13513300 | -0.09469500 | 1.10677900                                                                |
| N      | -7.04941200 | 0.44168000  | -1.19494800                                                               |

|   |             |             |             |
|---|-------------|-------------|-------------|
| N | -5.44140100 | -1.13421900 | 2.31233200  |
| C | -1.35544600 | -0.53472700 | -0.63312800 |
| C | -3.76886400 | -1.17421300 | -0.29025300 |
| C | -0.50762200 | 0.53424100  | -0.58693500 |
| C | 0.96911300  | 0.56789500  | -0.84969800 |
| C | -5.14498100 | -0.58546800 | -0.13501900 |
| C | -2.81796400 | 1.12057200  | -0.02950800 |
| C | -1.02209200 | -1.94768900 | -0.98353700 |
| C | 1.78951000  | 0.28094900  | 0.41475300  |
| C | -5.91515200 | -0.57341100 | 1.02052500  |
| C | -5.82115200 | -0.05467700 | -1.24633200 |
| C | -7.67599900 | 0.41929900  | -0.00943900 |
| C | -9.04909000 | 1.00196400  | 0.07435700  |
| H | -3.52936500 | -1.88878600 | 0.49581500  |
| H | -3.72043400 | -1.70856300 | -1.23811100 |
| H | 1.25783300  | 1.54745600  | -1.23582900 |
| H | 1.21844400  | -0.16462900 | -1.61892300 |
| H | -3.75890700 | 1.57211000  | 0.23833000  |
| H | -1.27087900 | -2.63040800 | -0.16761600 |
| H | -1.55819500 | -2.27262000 | -1.87880400 |
| H | 0.04342900  | -2.03986800 | -1.18181900 |
| H | 1.58052400  | -0.71237200 | 0.81665400  |
| H | 1.59090900  | 1.01718100  | 1.19130600  |

|         |             |                                                                           |             |
|---------|-------------|---------------------------------------------------------------------------|-------------|
| H       | -5.33067800 | -0.04608000                                                               | -2.21553900 |
| H       | -5.21049000 | -2.13249500                                                               | 2.25919800  |
| H       | -6.21137000 | -1.03122400                                                               | 2.98416700  |
| H       | -8.98056700 | 2.09414500                                                                | 0.04599300  |
| H       | -9.64108200 | 0.69055000                                                                | -0.78726800 |
| H       | -9.53983900 | 0.70540700                                                                | 0.99905900  |
| P       | 4.06820800  | -0.82643500                                                               | -0.40755100 |
| O       | 4.32316300  | -1.79601200                                                               | 0.82620700  |
| H       | 4.96431200  | -1.42181000                                                               | 1.47344600  |
| O       | 5.48895100  | -0.06190800                                                               | -0.65199800 |
| O       | 3.56672600  | -1.51590700                                                               | -1.60606600 |
| P       | 6.56974700  | 0.46092600                                                                | 0.44987100  |
| O       | 6.36776400  | 2.02155000                                                                | 0.58849700  |
| H       | 6.50279100  | 2.54810500                                                                | -0.21203100 |
| O       | 7.95062800  | 0.34400300                                                                | -0.31581100 |
| H       | 8.24050300  | -0.55275600                                                               | -0.53564800 |
| O       | 6.39087200  | -0.25355800                                                               | 1.73509400  |
| H       | -4.62825900 | -0.64012400                                                               | 2.69647600  |
| PP-pP39 |             | $[\text{C}_{12}\text{H}_{20}\text{N}_4\text{O}_7\text{P}_2\text{S}]^{2+}$ |             |
| 2 1     |             |                                                                           |             |
| S       | 1.46905200  | 1.22781100                                                                | 1.93240700  |
| O       | -3.09830200 | 1.72819900                                                                | 0.45192400  |
| N       | 2.42887700  | -0.42549800                                                               | 0.30189600  |

|   |             |             |             |
|---|-------------|-------------|-------------|
| N | 6.67085700  | 0.60552500  | -0.95556600 |
| N | 7.02687300  | -1.19043900 | 0.56955400  |
| N | 4.62491200  | 1.07450300  | -1.87360600 |
| C | 1.04577100  | -0.56120800 | 0.14315900  |
| C | 3.41217800  | -1.27176000 | -0.46275700 |
| C | 0.36057000  | 0.28336500  | 0.96889000  |
| C | -1.12511600 | 0.45867700  | 1.10446400  |
| C | 4.83224200  | -0.81616900 | -0.34729800 |
| C | 2.78823400  | 0.47118200  | 1.20466600  |
| C | 0.48775900  | -1.54851200 | -0.82874400 |
| C | -1.64556700 | 1.58431600  | 0.21036200  |
| C | 5.36849200  | 0.28166000  | -1.07105800 |
| C | 5.73608800  | -1.50695900 | 0.44819600  |
| C | 7.43445000  | -0.13033300 | -0.14969400 |
| C | 8.88606600  | 0.24209000  | -0.04167600 |
| H | 3.06858500  | -1.27684700 | -1.49789500 |
| H | 3.30915700  | -2.28623600 | -0.07707400 |
| H | -1.38372500 | 0.68303200  | 2.14095800  |
| H | -1.62268100 | -0.47752500 | 0.84741400  |
| H | 3.81639300  | 0.68208200  | 1.45068700  |
| H | 0.74433100  | -1.27980600 | -1.85667800 |
| H | 0.86738600  | -2.55355500 | -0.63196800 |
| H | -0.59708100 | -1.57962200 | -0.75532900 |

|         |             |             |                                                                           |
|---------|-------------|-------------|---------------------------------------------------------------------------|
| H       | -1.47857100 | 1.39758600  | -0.84868200                                                               |
| H       | -1.23428800 | 2.55367500  | 0.47898100                                                                |
| H       | 5.39310500  | -2.36896000 | 1.01602100                                                                |
| H       | 3.69163800  | 0.83081600  | -2.15957300                                                               |
| H       | 5.11290000  | 1.76111200  | -2.42804300                                                               |
| H       | 9.08352800  | 1.18124700  | -0.55529600                                                               |
| H       | 9.17557200  | 0.32523400  | 1.00820100                                                                |
| H       | 9.50407400  | -0.54423100 | -0.48527100                                                               |
| P       | -4.25141700 | 1.27696200  | -0.46977100                                                               |
| O       | -5.57672200 | 1.85436500  | 0.08603000                                                                |
| H       | -6.20315900 | 1.14634200  | 0.42490500                                                                |
| O       | -4.35539600 | -0.30910000 | -0.51290700                                                               |
| O       | -3.89494700 | 1.78686500  | -1.89693800                                                               |
| P       | -5.53847300 | -1.32108700 | 0.05106100                                                                |
| O       | -4.78744100 | -2.34699900 | 0.97802100                                                                |
| H       | -4.72479000 | -2.10416100 | 1.91420000                                                                |
| O       | -5.80739200 | -2.11279900 | -1.27785100                                                               |
| H       | -6.45962400 | -2.82765800 | -1.22944500                                                               |
| O       | -6.60821300 | -0.49008100 | 0.65767500                                                                |
| H       | -4.43956600 | 1.50406700  | -2.64862600                                                               |
| PP-pP45 |             |             | $[\text{C}_{12}\text{H}_{20}\text{N}_4\text{O}_7\text{P}_2\text{S}]^{2+}$ |
| 2 1     |             |             |                                                                           |
| S       | 1.43889200  | 1.59735000  | 1.76451800                                                                |

|   |             |             |             |
|---|-------------|-------------|-------------|
| O | -3.12635600 | 2.01893700  | 0.17135300  |
| N | 2.32139800  | -0.27704800 | 0.34387900  |
| N | 6.59498100  | 0.43167400  | -1.01543400 |
| N | 6.88668600  | -1.21840000 | 0.67919400  |
| N | 4.56072100  | 0.89631300  | -1.96310000 |
| C | 0.93243800  | -0.38093300 | 0.21480400  |
| C | 3.26312600  | -1.24137800 | -0.32586900 |
| C | 0.28715400  | 0.58299000  | 0.93501200  |
| C | -1.18886300 | 0.83077800  | 1.05741000  |
| C | 4.70235200  | -0.84050200 | -0.25929100 |
| C | 2.72346700  | 0.70962500  | 1.12720600  |
| C | 0.32300000  | -1.45714100 | -0.62351800 |
| C | -1.70911000 | 1.73656000  | -0.06286200 |
| C | 5.27852600  | 0.15596800  | -1.09046200 |
| C | 5.58234400  | -1.48840300 | 0.59629400  |
| C | 7.33324900  | -0.25408100 | -0.14426700 |
| C | 8.80075400  | 0.06215200  | -0.08029400 |
| H | 2.91638900  | -1.33709300 | -1.35570600 |
| H | 3.11655900  | -2.20451000 | 0.16323500  |
| H | -1.41008600 | 1.29922300  | 2.01812400  |
| H | -1.71641200 | -0.12436000 | 1.04029200  |
| H | 3.76080400  | 0.91221700  | 1.33863100  |
| H | 0.56126200  | -1.32014700 | -1.68154500 |

|   |             |             |             |
|---|-------------|-------------|-------------|
| H | 0.67567700  | -2.44486300 | -0.31864900 |
| H | -0.76042900 | -1.44273300 | -0.52285600 |
| H | -1.58663000 | 1.29090700  | -1.04969400 |
| H | -1.22543400 | 2.71054800  | -0.05018800 |
| H | 5.20752300  | -2.27441500 | 1.24799500  |
| H | 3.60808000  | 0.67988300  | -2.20328400 |
| H | 5.06767100  | 1.50973600  | -2.58234100 |
| H | 9.03529400  | 0.93451500  | -0.68747900 |
| H | 9.10223000  | 0.23862400  | 0.95457800  |
| H | 9.37989200  | -0.79203600 | -0.44365900 |
| P | -4.30872900 | 1.34325800  | -0.61536600 |
| O | -5.59271200 | 2.12364400  | -0.14292200 |
| H | -5.62855300 | 2.39355900  | 0.78632500  |
| O | -4.41081800 | -0.12161300 | 0.21710700  |
| O | -4.21161800 | 1.11765500  | -2.05956100 |
| P | -5.09798000 | -1.50713900 | 0.11519700  |
| O | -4.70932900 | -2.37238700 | 1.35230100  |
| H | -5.07314000 | -2.13351700 | 2.22042900  |
| O | -4.50316400 | -2.21734300 | -1.13516500 |
| H | -4.76088500 | -3.13287100 | -1.32834800 |
| O | -6.62752700 | -1.20460300 | 0.02433800  |
| H | -7.25637500 | -1.93796000 | -0.07195600 |
